# Supplementary material for: Benefits of Alternative Criteria for Scheduling Dewatering Events at Navigation Locks and Repairing or Replacing Lock Components
Source: Atypon-hosted journal article supplement (doi:10.1061/(asce)is.1943-555x.0000688), 2022-04-21

## SUPPLEMENTAL MATERIALS

*ASCE Journal of Infrastructure Systems*

# Benefits of Alternative Criteria for Scheduling Dewatering Events at Navigation Locks and Repairing or Replacing Lock Components

Martin T. Schultz and Matthew D. Smith

**DOI:** 10.1061/(ASCE)IS.1943-555X.0000688

© ASCE 2022

[www.ascelibrary.org](http://www.ascelibrary.org)

### Convergence of the Mean

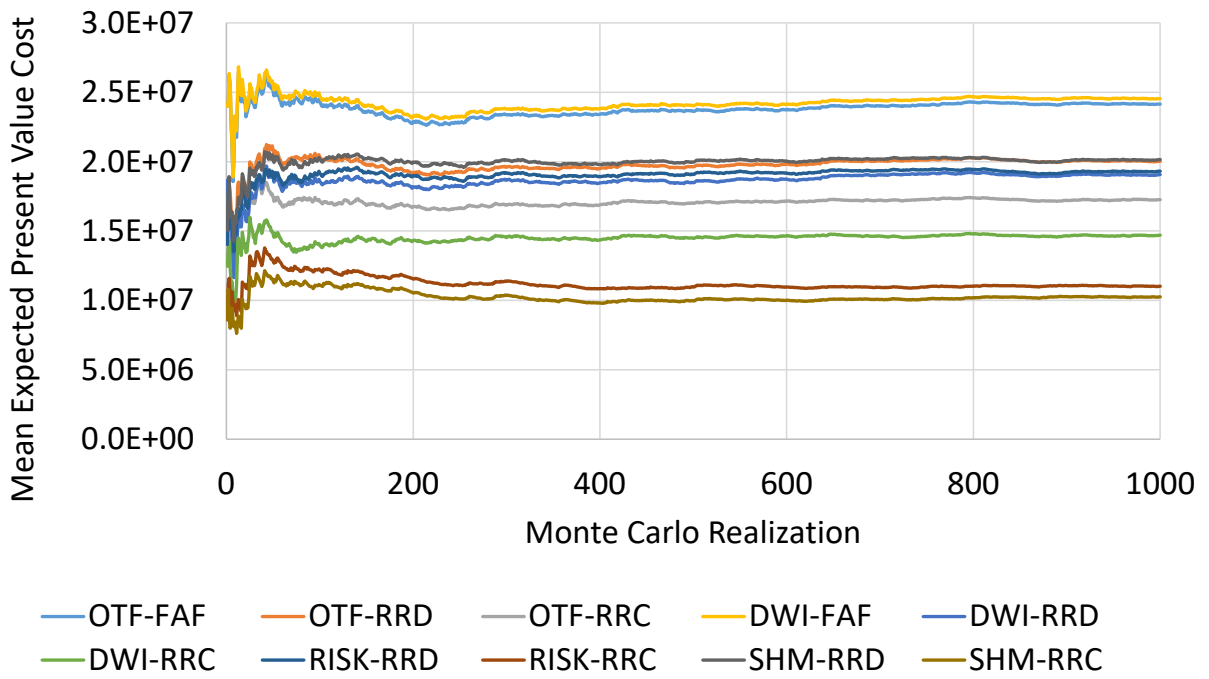

### Convergence of the Variance

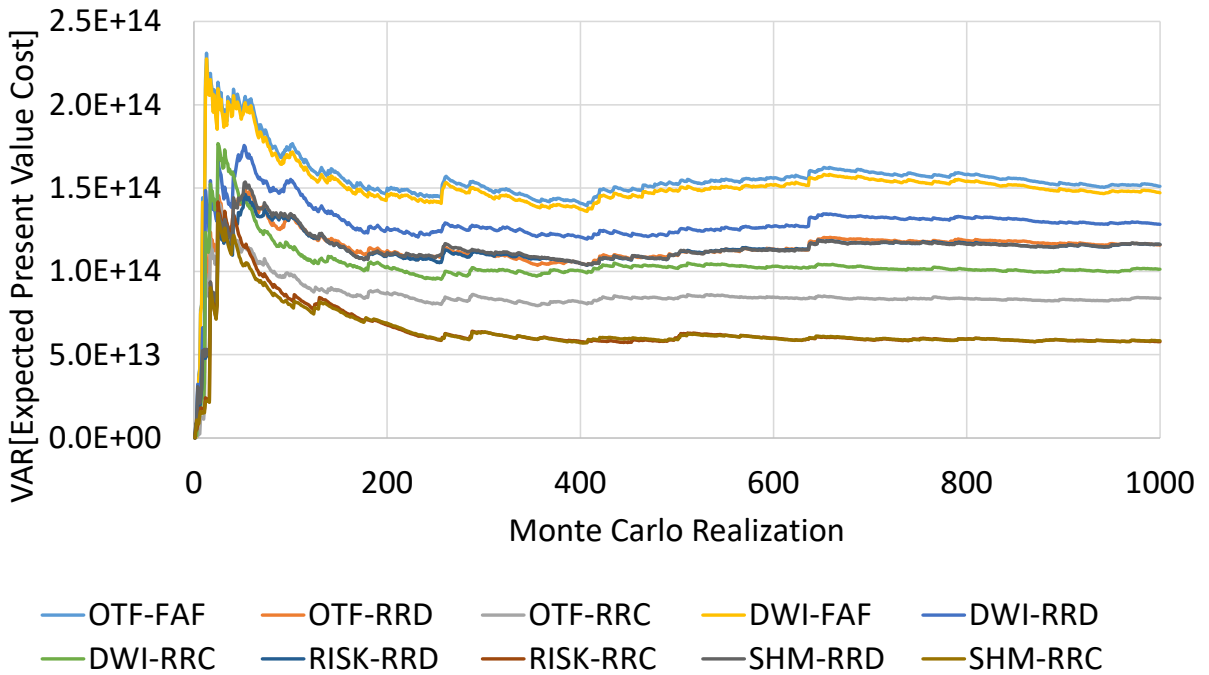

Supplement: supplemental_materials_is.1943-555x.0000688_schultz.pdf [file supplemental_materials_is.1943-555x.0000688_schultz.pdf]
